# Supplementary material for: Metabolism-Related Gene TXNRD1 Regulates Inflammation and Oxidative Stress Induced by Cigarette Smoke through the Nrf2/HO-1 Pathway in the Small Airway Epithelium
Source: Oxid Med Cell Longev. 2022 Dec 19;2022:7067623. doi: 10.1155/2022/7067623 (PMC9792251; doi:10.1155/2022/7067623)
Supplement: Supplementary Materials — Supplementary table 1.1: the list of amino metabolism-related genes. Supplementary table 1.2: the list of glucose metabolism-related genes. Supplementary table 1.3: the list of lipid metabolism-related genes. Supplementary table 2: the primers for RT-qPCR in this study. Supplementary table 3: results of KEGG analysis of 24 differentially expressed metabolism-related genes. Supplementary table 4: results of GO pathway enrichment analysis of 24 differentially expressed metabolism-related genes. [file 7067623.f1.zip]

Archive with 6 entries (6 files):
- Supplementary table 1.1.txt
- Supplementary table 1.2.txt
- Supplementary table 1.3.txt
- Supplementary table 2.docx
- Supplementary table 3.txt
- Supplementary table 4.txt
