# Supplementary material for: Metabolism-Related Gene TXNRD1 Regulates Inflammation and Oxidative Stress Induced by Cigarette Smoke through the Nrf2/HO-1 Pathway in the Small Airway Epithelium
Source: Oxid Med Cell Longev. 2022 Dec 19;2022:7067623. doi: 10.1155/2022/7067623 (PMC9792251; doi:10.1155/2022/7067623)
Supplement: Supplementary Materials — Supplementary table 1.1: the list of amino metabolism-related genes. Supplementary table 1.2: the list of glucose metabolism-related genes. Supplementary table 1.3: the list of lipid metabolism-related genes. Supplementary table 2: the primers for RT-qPCR in this study. Supplementary table 3: results of KEGG analysis of 24 differentially expressed metabolism-related genes. Supplementary table 4: results of GO pathway enrichment analysis of 24 differentially expressed metabolism-related genes. [file 7067623.f1.zip › Supplementary table 1.1.txt]

Standard name	REACTOME_METABOLISM_OF_AMINO_ACIDS_AND_DERIVATIVES
Systematic name	M727
Brief description	Metabolism?of?amino?acids and derivatives
	AADAT
	AANAT
	AASS
	ACAD8
	ACADSB
	ACAT1
	ACMSD
	ADI1
	ADO
	AFMID
	AGMAT
	AGXT
	AGXT2
	AHCY
	AIMP1
	AIMP2
	ALDH18A1
	ALDH4A1
	ALDH6A1
	ALDH7A1
	ALDH9A1
	AMD1
	AMDHD1
	AMT
	APIP
	ARG1
	ARG2
	ASL
	ASMT
	ASNS
	ASPA
	ASPG
	ASRGL1
	ASS1
	AUH
	AZIN1
	AZIN2
	BBOX1
	BCAT1
	BCAT2
	BCKDHA
	BCKDHB
	BCKDK
	BHMT
	BHMT2
	CARNMT1
	CARNS1
	CBS
	CBSL
	CDO1
	CGA
	CHDH
	CKB
	CKM
	CKMT1A
	CKMT1B
	CKMT2
	CPS1
	CRYM
	CSAD
	CTH
	DAO
	DARS1
	DBH
	DBT
	DCT
	DDC
	DDO
	DHTKD1
	DIO1
	DIO2
	DIO3
	DLAT
	DLD
	DLST
	DMGDH
	DUOX1
	DUOX2
	ECHS1
	EEF1E1
	EEFSEC
	ENOPH1
	EPRS1
	ETHE1
	FAH
	FAU
	FOLH1
	FTCD
	GADL1
	GAMT
	GATM
	GCAT
	GCDH
	GCSH
	GLDC
	GLS
	GLS2
	GLUD1
	GLUD2
	GLUL
	GNMT
	GOT1
	GOT2
	GPT
	GPT2
	GRHPR
	GSR
	GSTZ1
	HAAO
	HAL
	HAO1
	HDC
	HGD
	HIBADH
	HIBCH
	HNMT
	HOGA1
	HPD
	HSD17B10
	HYKK
	IARS1
	IDO1
	IDO2
	IL4I1
	INMT
	IVD
	IYD
	KARS1
	KMO
	KYAT1
	KYAT3
	KYNU
	LARS1
	LIAS
	LIPT1
	LIPT2
	MARS1
	MAT1A
	MCCC1
	MCCC2
	MPST
	MRI1
	MTAP
	MTR
	MTRR
	NAALAD2
	NAGS
	NAT8L
	NDUFAB1
	NMRAL1
	NNMT
	NQO1
	OAT
	OAZ1
	OAZ2
	OAZ3
	OCA2
	ODC1
	OGDH
	OTC
	PAH
	PAOX
	PAPSS1
	PAPSS2
	PCBD1
	PDHA1
	PDHA2
	PDHB
	PDHX
	PHGDH
	PHYKPL
	PIPOX
	PNMT
	PPM1K
	PRODH
	PRODH2
	PSAT1
	PSMA1
	PSMA2
	PSMA3
	PSMA4
	PSMA5
	PSMA6
	PSMA7
	PSMA8
	PSMB1
	PSMB10
	PSMB11
	PSMB2
	PSMB3
	PSMB4
	PSMB5
	PSMB6
	PSMB7
	PSMB8
	PSMB9
	PSMC1
	PSMC2
	PSMC3
	PSMC4
	PSMC5
	PSMC6
	PSMD1
	PSMD10
	PSMD11
	PSMD12
	PSMD13
	PSMD14
	PSMD2
	PSMD3
	PSMD4
	PSMD5
	PSMD6
	PSMD7
	PSMD8
	PSMD9
	PSME1
	PSME2
	PSME3
	PSME4
	PSMF1
	PSPH
	PSTK
	PXMP2
	PYCR1
	PYCR2
	PYCR3
	QARS1
	QDPR
	RARS1
	RIDA
	RIMKLA
	RIMKLB
	RPL10
	RPL10A
	RPL10L
	RPL11
	RPL12
	RPL13
	RPL13A
	RPL14
	RPL15
	RPL17
	RPL18
	RPL18A
	RPL19
	RPL21
	RPL22
	RPL22L1
	RPL23
	RPL23A
	RPL24
	RPL26
	RPL26L1
	RPL27
	RPL27A
	RPL28
	RPL29
	RPL3
	RPL30
	RPL31
	RPL32
	RPL34
	RPL35
	RPL35A
	RPL36
	RPL36A
	RPL36AL
	RPL37
	RPL37A
	RPL38
	RPL39
	RPL39L
	RPL3L
	RPL4
	RPL41
	RPL5
	RPL6
	RPL7
	RPL7A
	RPL8
	RPL9
	RPLP0
	RPLP1
	RPLP2
	RPS10
	RPS11
	RPS12
	RPS13
	RPS14
	RPS15
	RPS15A
	RPS16
	RPS17
	RPS18
	RPS19
	RPS2
	RPS20
	RPS21
	RPS23
	RPS24
	RPS25
	RPS26
	RPS27
	RPS27A
	RPS27L
	RPS28
	RPS29
	RPS3
	RPS3A
	RPS4X
	RPS4Y1
	RPS4Y2
	RPS5
	RPS6
	RPS7
	RPS8
	RPS9
	RPSA
	SARDH
	SARS1
	SAT1
	SCLY
	SDS
	SDSL
	SECISBP2
	SEM1
	SEPHS2
	SEPSECS
	SERINC1
	SERINC2
	SERINC3
	SERINC4
	SERINC5
	SHMT1
	SLC25A10
	SLC25A12
	SLC25A13
	SLC25A15
	SLC25A2
	SLC25A21
	SLC25A44
	SLC36A4
	SLC3A2
	SLC44A1
	SLC45A2
	SLC5A5
	SLC6A11
	SLC6A12
	SLC6A7
	SLC6A8
	SLC7A5
	SMOX
	SMS
	SQOR
	SRM
	SRR
	SUOX
	TAT
	TDO2
	TH
	TMLHE
	TPH1
	TPH2
	TPO
	TSHB
	TST
	TSTD1
	TXN2
	TXNRD1
	TYR
	TYRP1
	UBA52
	UROC1
