# Supplementary material for: Metabolism-Related Gene TXNRD1 Regulates Inflammation and Oxidative Stress Induced by Cigarette Smoke through the Nrf2/HO-1 Pathway in the Small Airway Epithelium
Source: Oxid Med Cell Longev. 2022 Dec 19;2022:7067623. doi: 10.1155/2022/7067623 (PMC9792251; doi:10.1155/2022/7067623)
Supplement: Supplementary Materials — Supplementary table 1.1: the list of amino metabolism-related genes. Supplementary table 1.2: the list of glucose metabolism-related genes. Supplementary table 1.3: the list of lipid metabolism-related genes. Supplementary table 2: the primers for RT-qPCR in this study. Supplementary table 3: results of KEGG analysis of 24 differentially expressed metabolism-related genes. Supplementary table 4: results of GO pathway enrichment analysis of 24 differentially expressed metabolism-related genes. [file 7067623.f1.zip › Supplementary table 1.2.txt]

Standard name	BIOCARTA_GLYCOLYSIS_PATHWAY	GOBP_FRUCTOSE_1_6_BISPHOSPHATE_METABOLIC_PROCESS	GOBP_LACTATE_TRANSMEMBRANE_TRANSPORT	GOMF_LACTATE_TRANSMEMBRANE_TRANSPORTER_ACTIVITY	HALLMARK_GLYCOLYSIS	KEGG_GLYCOLYSIS_GLUCONEOGENESIS	MODULE_306	REACTOME_GLYCOLYSIS	REACTOME_REGULATION_OF_GLYCOLYSIS_BY_FRUCTOSE_2_6_BISPHOSPHATE_METABOLISM	WP_AEROBIC_GLYCOLYSIS	WP_GLYCOLYSIS_AND_GLUCONEOGENESIS	WP_GLYCOLYSIS_IN_SENESCENCE	WP_HIF1A_AND_PPARG_REGULATION_OF_GLYCOLYSIS
Systematic name	M15109	M22966	M34151	M26344	M5937	M11521	M18792	M5113	M27950	M39816	M39474	M40053	M39394
Brief description	Glycolysis?Pathway	The chemical reactions and pathways involving fructose 1,6-bisphosphate, also known as FBP. The D enantiomer is a metabolic intermediate in?glycolysis?and gluconeogenesis. [ISBN:0198506732]	The process in which lactate is transported across a membrane. Lactate is 2-hydroxypropanoate, CH3-CHOH-COOH; L(+)-lactate is formed by anaerobic?glycolysis?in animal tissues, and DL-lactate is found in sour milk, molasses and certain fruit juices. [GOC:mcc, ISBN:0198506732]	Enables the transfer of lactate from one side of a membrane to the other. Lactate is 2-hydroxypropanoate, CH3-CHOH-COOH; L(+)-lactate is formed by anaerobic?glycolysis?in animal tissues, and DL-lactate is found in sour milk, molasses and certain fruit juices. [GOC:ai, ISBN:0198506732]	Genes encoding proteins involved in?glycolysis?and gluconeogenesis.	Glycolysis?/ Gluconeogenesis	Glycolysis?and TCA cycle.	Glycolysis	Regulation of?glycolysis?by fructose 2,6-bisphosphate metabolism	Aerobic?glycolysis	Glycolysis?and gluconeogenesis	Glycolysis?in senescence	HIF1A and PPARG regulation of?glycolysis
	GAPDH	ALDOA	EMB	SLC16A1	ABCB6	ACSS1	ACO1	AAAS	PFKFB1	ALDOA	ALDOA	ALDOC	GAPDH
	GPI	ALDOB	MYC	SLC16A3	ADORA2B	ACSS2	ACO2	ADPGK	PFKFB2	ENO1	ALDOB	ENO1	GPAT3
	HK1	ALDOC	SLC16A1	SLC16A7	AGL	ADH1A	ALDOA	ALDOA	PFKFB3	GAPDH	ALDOC	G6PD	GPD1
		FBP1	SLC16A3	SLC16A8	AGRN	ADH1B	ALDOC	ALDOB	PFKFB4	GPI	DLAT	GAPDH	HIF1A
		FBP2	SLC16A7	SLC5A12	AK3	ADH1C	ENO1	ALDOC	PPP2CA	HK1	DLD	HK1	LDHA
		IFNG	SLC16A8	SLC5A8	AK4	ADH4	ENO2	BPGM	PPP2CB	LDHA	ENO1	LDHA	PPARG
		PFKL	SLC5A12		AKR1A1	ADH5	FH	ENO1	PPP2R1A	PFKM	ENO2	PGK1	SLC2A1
		PFKM	SLC5A8		ALDH7A1	ADH6	GAPDH	ENO2	PPP2R1B	PGAM2	ENO3	PKM	TPI1
		PFKP			ALDH9A1	ADH7	IDH1	ENO3	PPP2R5D	PGK1	FBP1	PRKAA1
		TIGAR			ALDOA	AKR1A1	IDH2	GAPDH	PRKACA	PKM	FBP2	RB1
					ALDOB	ALDH1A3	IDH3B	GAPDHS	PRKACB	SLC2A1	G6PC1	TP53
					ALG1	ALDH1B1	IDH3G	GCK	PRKACG	TPI1	GAPDH
					ANG	ALDH2	LDHA	GCKR			GCK
					ANGPTL4	ALDH3A1	MDH1	GNPDA1			GOT1
					ANKZF1	ALDH3A2	PCK1	GNPDA2			GOT2
					ARPP19	ALDH3B1	PCK2	GPI			GPI
					ARTN	ALDH3B2	PFKM	HK1			HK1
					AURKA	ALDH7A1	PFKP	HK2			HK2
					B3GALT6	ALDH9A1	PGAM1	HK3			HK3
					B3GAT1	ALDOA	PGK1	NDC1			LDHA
					B3GAT3	ALDOB	PKM	NUP107			LDHAL6B
					B3GNT3	ALDOC	SDHA	NUP133			LDHB
					B4GALT1	BPGM	SDHB	NUP153			LDHC
					B4GALT2	DLAT	SDHD	NUP155			MDH1
					B4GALT4	DLD	SUCLG1	NUP160			MDH2
					B4GALT7	ENO1	TPI1	NUP188			MPC1
					BIK	ENO2		NUP205			MPC2
					BPNT1	ENO3		NUP210			PC
					CACNA1H	FBP1		NUP214			PCK1
					CAPN5	FBP2		NUP35			PDHA1
					CASP6	G6PC1		NUP37			PFKL
					CD44	G6PC2		NUP42			PFKM
					CDK1	GALM		NUP43			PFKP
					CENPA	GAPDH		NUP50			PGAM1
					CHPF	GCK		NUP54			PGAM2
					CHPF2	GPI		NUP58			PGK1
					CHST1	HK1		NUP62			PGK2
					CHST12	HK2		NUP85			PKLR
					CHST2	HK3		NUP88			PKM
					CHST4	LDHA		NUP93			SLC2A1
					CHST6	LDHAL6A		NUP98			SLC2A2
					CITED2	LDHAL6B		PFKFB1			SLC2A3
					CLDN3	LDHB		PFKFB2			SLC2A4
					CLDN9	LDHC		PFKFB3			SLC2A5
					CLN6	PCK1		PFKFB4			TPI1
					COG2	PCK2		PFKL
					COL5A1	PDHA1		PFKM
					COPB2	PDHA2		PFKP
					CTH	PDHB		PGAM1
					CXCR4	PFKL		PGAM2
					CYB5A	PFKM		PGK1
					DCN	PFKP		PGK2
					DDIT4	PGAM1		PGM2L1
					DEPDC1	PGAM2		PGP
					DLD	PGAM4		PKLR
					DPYSL4	PGK1		PKM
					DSC2	PGK2		POM121
					ECD	PGM1		POM121C
					EFNA3	PGM2		PPP2CA
					EGFR	PKLR		PPP2CB
					EGLN3	PKM		PPP2R1A
					ELF3	TPI1		PPP2R1B
					ENO1			PPP2R5D
					ENO2			PRKACA
					ERO1A			PRKACB
					EXT1			PRKACG
					EXT2			RAE1
					FAM162A			RANBP2
					FBP2			SEC13
					FKBP4			SEH1L
					FUT8			TPI1
					G6PD			TPR
					GAL3ST1
					GALE
					GALK1
					GALK2
					GAPDHS
					GCLC
					GFPT1
					GFUS
					GLCE
					GLRX
					GMPPA
					GMPPB
					GNE
					GNPDA1
					GOT1
					GOT2
					GPC1
					GPC3
					GPC4
					GPR87
					GUSB
					GYS1
					GYS2
					HAX1
					HDLBP
					HK2
					HMMR
					HOMER1
					HS2ST1
					HS6ST2
					HSPA5
					IDH1
					IDUA
					IER3
					IGFBP3
					IL13RA1
					IRS2
					ISG20
					KDELR3
					KIF20A
					KIF2A
					LCT
					LDHA
					LDHC
					LHPP
					LHX9
					MDH1
					MDH2
					ME1
					ME2
					MED24
					MERTK
					MET
					MIF
					MIOX
					MPI
					MXI1
					NANP
					NASP
					NDST3
					NDUFV3
					NOL3
					NSDHL
					NT5E
					P4HA1
					P4HA2
					PAM
					PAXIP1
					PC
					PDK3
					PFKFB1
					PFKP
					PGAM1
					PGAM2
					PGK1
					PGLS
					PGM2
					PHKA2
					PKM
					PKP2
					PLOD1
					PLOD2
					PMM2
					POLR3K
					PPFIA4
					PPIA
					PPP2CB
					PRPS1
					PSMC4
					PYGB
					PYGL
					QSOX1
					RARS1
					RBCK1
					RPE
					RRAGD
					SAP30
					SDC1
					SDC2
					SDC3
					SDHC
					SLC16A3
					SLC25A10
					SLC25A13
					SLC35A3
					SLC37A4
					SOD1
					SOX9
					SPAG4
					SRD5A3
					STC1
					STC2
					STMN1
					TALDO1
					TFF3
					TGFA
					TGFBI
					TKTL1
					TPBG
					TPI1
					TPST1
					TXN
					UGP2
					VCAN
					VEGFA
					VLDLR
					XYLT2
					ZNF292
