# Supplementary material for: Metabolism-Related Gene TXNRD1 Regulates Inflammation and Oxidative Stress Induced by Cigarette Smoke through the Nrf2/HO-1 Pathway in the Small Airway Epithelium
Source: Oxid Med Cell Longev. 2022 Dec 19;2022:7067623. doi: 10.1155/2022/7067623 (PMC9792251; doi:10.1155/2022/7067623)
Supplement: Supplementary Materials — Supplementary table 1.1: the list of amino metabolism-related genes. Supplementary table 1.2: the list of glucose metabolism-related genes. Supplementary table 1.3: the list of lipid metabolism-related genes. Supplementary table 2: the primers for RT-qPCR in this study. Supplementary table 3: results of KEGG analysis of 24 differentially expressed metabolism-related genes. Supplementary table 4: results of GO pathway enrichment analysis of 24 differentially expressed metabolism-related genes. [file 7067623.f1.zip › Supplementary table 3.txt]

ID	Description	GeneRatio	BgRatio	pvalue	p.adjust	qvalue	geneID	Count
hsa00980	Metabolism of xenobiotics by cytochrome P450	7/21	78/8115	6.01443E-10	2.82678E-08	1.64605E-08	ADH7/AKR1C1/ALDH3A1/CBR1/CYP1A1/CYP1B1/CYP3A5	7
hsa05208	Chemical carcinogenesis - reactive oxygen species	6/21	223/8115	1.54601E-05	0.000147755	8.60385E-05	AKR1C1/AKR1C3/CBR1/CYP1A1/CYP1B1/NQO1	6
hsa00140	Steroid hormone biosynthesis	5/21	61/8115	3.76869E-07	7.48206E-06	4.35685E-06	AKR1C1/AKR1C3/CYP1A1/CYP1B1/CYP3A5	5
hsa00790	Folate biosynthesis	4/21	26/8115	4.77578E-07	7.48206E-06	4.35685E-06	AKR1B1/AKR1B10/AKR1C3/CBR1	4
hsa00590	Arachidonic acid metabolism	4/21	61/8115	1.57186E-05	0.000147755	8.60385E-05	AKR1C3/CBR1/CYP4F3/GPX2	4
hsa05204	Chemical carcinogenesis - DNA adducts	4/21	69/8115	2.56914E-05	0.000201249	0.000117189	CBR1/CYP1A1/CYP1B1/CYP3A5	4
hsa00350	Tyrosine metabolism	3/21	36/8115	0.000100956	0.000677845	0.000394714	ADH7/ALDH3A1/HGD	3
hsa04913	Ovarian steroidogenesis	3/21	51/8115	0.000287192	0.001687256	0.000982501	AKR1C3/CYP1A1/CYP1B1	3
hsa00830	Retinol metabolism	3/21	68/8115	0.000671858	0.003508592	0.002043077	ADH7/CYP1A1/CYP3A5	3
hsa00982	Drug metabolism - cytochrome P450	3/21	72/8115	0.000794234	0.003732898	0.002173692	ADH7/ALDH3A1/CYP3A5	3
hsa00052	Galactose metabolism	2/21	31/8115	0.00283484	0.012112496	0.007053189	AKR1B1/AKR1B10	2
hsa00051	Fructose and mannose metabolism	2/21	33/8115	0.003208902	0.012307322	0.007166638	AKR1B1/AKR1B10	2
hsa00040	Pentose and glucuronate interconversions	2/21	34/8115	0.003404153	0.012307322	0.007166638	AKR1B1/AKR1B10	2
hsa00380	Tryptophan metabolism	2/21	42/8115	0.005159896	0.017322509	0.010087015	CYP1A1/CYP1B1	2
hsa00620	Pyruvate metabolism	2/21	47/8115	0.006428145	0.020141522	0.011728546	ADH7/ME1	2
hsa00561	Glycerolipid metabolism	2/21	61/8115	0.010647876	0.031278135	0.018213472	AKR1B1/AKR1B10	2
hsa00010	Glycolysis / Gluconeogenesis	2/21	67/8115	0.012745472	0.035237482	0.020519027	ADH7/ALDH3A1	2
hsa04918	Thyroid hormone synthesis	2/21	75/8115	0.015799433	0.041254074	0.024022529	DUOX2/GPX2	2
hsa00130	Ubiquinone and other terpenoid-quinone biosynthesis	1/21	11/8115	0.028117435	0.069553654	0.040501568	NQO1	1
hsa00360	Phenylalanine metabolism	1/21	16/8115	0.040647679	0.095522045	0.055623139	ALDH3A1	1
hsa00450	Selenocompound metabolism	1/21	17/8115	0.043135195	0.096540675	0.056216295	TXNRD1	1
