# Supplementary material for: Metabolism-Related Gene TXNRD1 Regulates Inflammation and Oxidative Stress Induced by Cigarette Smoke through the Nrf2/HO-1 Pathway in the Small Airway Epithelium
Source: Oxid Med Cell Longev. 2022 Dec 19;2022:7067623. doi: 10.1155/2022/7067623 (PMC9792251; doi:10.1155/2022/7067623)
Supplement: Supplementary Materials — Supplementary table 1.1: the list of amino metabolism-related genes. Supplementary table 1.2: the list of glucose metabolism-related genes. Supplementary table 1.3: the list of lipid metabolism-related genes. Supplementary table 2: the primers for RT-qPCR in this study. Supplementary table 3: results of KEGG analysis of 24 differentially expressed metabolism-related genes. Supplementary table 4: results of GO pathway enrichment analysis of 24 differentially expressed metabolism-related genes. [file 7067623.f1.zip › Supplementary table 4.txt]

ID	Description	GeneRatio	BgRatio	pvalue	p.adjust	qvalue	geneID	Count
GO:0042572	retinol metabolic process	7/24	47/18866	1.25094E-13	5.7233E-11	3.4034E-11	ADH7/AKR1B1/AKR1B10/AKR1C3/CYP1A1/CYP1B1/CYP3A5	7
GO:0034308	primary alcohol metabolic process	8/24	94/18866	1.93029E-13	5.7233E-11	3.4034E-11	ADH7/AKR1B1/AKR1B10/AKR1C1/AKR1C3/CYP1A1/CYP1B1/CYP3A5	8
GO:0001523	retinoid metabolic process	8/24	108/18866	6.04002E-13	1.19391E-10	7.09967E-11	ADH7/AKR1B1/AKR1B10/AKR1C1/AKR1C3/CYP1A1/CYP1B1/CYP3A5	8
GO:0016101	diterpenoid metabolic process	8/24	114/18866	9.39985E-13	1.39353E-10	8.28671E-11	ADH7/AKR1B1/AKR1B10/AKR1C1/AKR1C3/CYP1A1/CYP1B1/CYP3A5	8
GO:0006721	terpenoid metabolic process	8/24	124/18866	1.86615E-12	2.21326E-10	1.31613E-10	ADH7/AKR1B1/AKR1B10/AKR1C1/AKR1C3/CYP1A1/CYP1B1/CYP3A5	8
GO:0034754	cellular hormone metabolic process	8/24	134/18866	3.50539E-12	3.0302E-10	1.80193E-10	ADH7/AKR1B1/AKR1B10/AKR1C1/AKR1C3/CYP1A1/CYP1B1/CYP3A5	8
GO:0042445	hormone metabolic process	9/24	221/18866	3.96086E-12	3.0302E-10	1.80193E-10	ADH7/AKR1B1/AKR1B10/AKR1C1/AKR1C3/CYP1A1/CYP1B1/CYP3A5/DUOX2	9
GO:1901661	quinone metabolic process	6/24	36/18866	4.08796E-12	3.0302E-10	1.80193E-10	AKR1B1/AKR1B10/AKR1C1/AKR1C3/CYP4F11/CYP4F3	6
GO:0006720	isoprenoid metabolic process	8/24	144/18866	6.28121E-12	4.13862E-10	2.46106E-10	ADH7/AKR1B1/AKR1B10/AKR1C1/AKR1C3/CYP1A1/CYP1B1/CYP3A5	8
GO:0019748	secondary metabolic process	6/24	57/18866	7.48613E-11	4.43927E-09	2.63984E-09	AKR1B1/AKR1B10/AKR1C1/AKR1C3/CYP1A1/CYP1B1	6
GO:0019369	arachidonic acid metabolic process	6/24	58/18866	8.34307E-11	4.49767E-09	2.67457E-09	AKR1C3/CBR1/CYP1A1/CYP1B1/CYP4F11/CYP4F3	6
GO:0006805	xenobiotic metabolic process	7/24	118/18866	9.91393E-11	4.52228E-09	2.6892E-09	AHRR/AKR1C1/ALDH3A1/CYP1A1/CYP1B1/CYP3A5/NQO1	7
GO:0033559	unsaturated fatty acid metabolic process	7/24	118/18866	9.91393E-11	4.52228E-09	2.6892E-09	AKR1C1/AKR1C3/CBR1/CYP1A1/CYP1B1/CYP4F11/CYP4F3	7
GO:0120254	olefinic compound metabolic process	7/24	121/18866	1.18448E-10	4.9304E-09	2.9319E-09	AKR1C1/AKR1C3/CBR1/CYP1A1/CYP1B1/CYP4F11/CYP4F3	7
GO:0006690	icosanoid metabolic process	7/24	122/18866	1.25558E-10	4.9304E-09	2.9319E-09	AKR1C1/AKR1C3/CBR1/CYP1A1/CYP1B1/CYP4F11/CYP4F3	7
GO:0071466	cellular response to xenobiotic stimulus	7/24	123/18866	1.33029E-10	4.9304E-09	2.9319E-09	AHRR/AKR1C1/ALDH3A1/CYP1A1/CYP1B1/CYP3A5/NQO1	7
GO:0009410	response to xenobiotic stimulus	7/24	130/18866	1.96762E-10	6.86352E-09	4.08144E-09	AHRR/AKR1C1/ALDH3A1/CYP1A1/CYP1B1/CYP3A5/NQO1	7
GO:0030647	aminoglycoside antibiotic metabolic process	4/24	10/18866	4.20734E-10	1.38609E-08	8.24245E-09	AKR1B1/AKR1B10/AKR1C1/AKR1C3	4
GO:1901568	fatty acid derivative metabolic process	7/24	175/18866	1.5874E-09	4.95437E-08	2.94615E-08	AKR1C1/AKR1C3/CBR1/CYP1A1/CYP1B1/CYP4F11/CYP4F3	7
GO:0044282	small molecule catabolic process	9/24	452/18866	2.28322E-09	6.76975E-08	4.02568E-08	ADH7/AKR1B10/AKR1C3/CD44/CYP1A1/CYP4F11/CYP4F3/HGD/NT5E	9
GO:0001676	long-chain fatty acid metabolic process	6/24	113/18866	4.97819E-09	1.40575E-07	8.35937E-08	AKR1C3/CBR1/CYP1A1/CYP1B1/CYP4F11/CYP4F3	6
GO:1902644	tertiary alcohol metabolic process	4/24	20/18866	9.6249E-09	2.59435E-07	1.54275E-07	AKR1B1/AKR1B10/AKR1C1/AKR1C3	4
GO:0016137	glycoside metabolic process	4/24	21/18866	1.18795E-08	3.06285E-07	1.82134E-07	AKR1B1/AKR1B10/AKR1C1/AKR1C3	4
GO:0006066	alcohol metabolic process	8/24	385/18866	1.54613E-08	3.82023E-07	2.27173E-07	ADH7/AKR1B1/AKR1B10/AKR1C1/AKR1C3/CYP1A1/CYP1B1/CYP3A5	8
GO:0009636	response to toxic substance	7/24	250/18866	1.88404E-08	4.3897E-07	2.61036E-07	AKR1B10/CYP1A1/CYP1B1/DUOX2/GPX2/NQO1/TXNRD1	7
GO:0006631	fatty acid metabolic process	8/24	396/18866	1.92466E-08	4.3897E-07	2.61036E-07	ADH7/AKR1C1/AKR1C3/CBR1/CYP1A1/CYP1B1/CYP4F11/CYP4F3	8
GO:0042180	cellular ketone metabolic process	7/24	260/18866	2.46771E-08	5.41982E-07	3.22294E-07	AKR1B1/AKR1B10/AKR1C1/AKR1C3/CYP4F11/CYP4F3/NQO1	7
GO:1901616	organic hydroxy compound catabolic process	5/24	76/18866	3.71627E-08	7.87053E-07	4.68027E-07	ADH7/AKR1B10/AKR1C3/CYP4F11/CYP4F3	5
GO:0042573	retinoic acid metabolic process	4/24	33/18866	8.03982E-08	1.644E-06	9.77618E-07	ADH7/AKR1C3/CYP1A1/CYP3A5	4
GO:1990748	cellular detoxification	5/24	114/18866	2.86007E-07	5.54308E-06	3.29623E-06	AKR1B10/DUOX2/GPX2/NQO1/TXNRD1	5
GO:0006775	fat-soluble vitamin metabolic process	4/24	45/18866	2.89773E-07	5.54308E-06	3.29623E-06	CBR1/CYP1A1/CYP4F11/CYP4F3	4
GO:0097237	cellular response to toxic substance	5/24	122/18866	4.01135E-07	7.43352E-06	4.4204E-06	AKR1B10/DUOX2/GPX2/NQO1/TXNRD1	5
GO:1901657	glycosyl compound metabolic process	5/24	129/18866	5.29492E-07	9.5148E-06	5.65804E-06	AKR1B1/AKR1B10/AKR1C1/AKR1C3/NT5E	5
GO:0006766	vitamin metabolic process	5/24	131/18866	5.7156E-07	9.96868E-06	5.92794E-06	AKR1C3/CBR1/CYP1A1/CYP4F11/CYP4F3	5
GO:0098754	detoxification	5/24	138/18866	7.40049E-07	1.25386E-05	7.45614E-06	AKR1B10/DUOX2/GPX2/NQO1/TXNRD1	5
GO:0042574	retinal metabolic process	3/24	15/18866	8.14798E-07	1.34215E-05	7.98121E-06	AKR1C1/AKR1C3/CYP1B1	3
GO:0034310	primary alcohol catabolic process	3/24	16/18866	1.00199E-06	1.60589E-05	9.54956E-06	ADH7/AKR1B10/AKR1C3	3
GO:0006081	cellular aldehyde metabolic process	4/24	63/18866	1.14091E-06	1.78042E-05	1.05874E-05	AKR1C1/AKR1C3/ALDH3A1/CYP1B1	4
GO:0008202	steroid metabolic process	6/24	332/18866	2.92402E-06	4.44601E-05	2.64385E-05	AKR1B1/AKR1C1/AKR1C3/CYP1A1/CYP1B1/CYP3A5	6
GO:0062197	cellular response to chemical stress	6/24	360/18866	4.6608E-06	6.90963E-05	4.10886E-05	AKR1B1/AKR1C3/CYP1B1/GPX2/NQO1/TXNRD1	6
GO:0098869	cellular oxidant detoxification	4/24	103/18866	8.1855E-06	0.00011839	7.04016E-05	DUOX2/GPX2/NQO1/TXNRD1	4
GO:0008210	estrogen metabolic process	3/24	32/18866	8.75698E-06	0.00012364	7.35236E-05	CYP1A1/CYP1B1/CYP3A5	3
GO:0044242	cellular lipid catabolic process	5/24	236/18866	1.02765E-05	0.00014172	8.42746E-05	AKR1B10/AKR1C3/CYP1B1/CYP4F11/CYP4F3	5
GO:0008207	C21-steroid hormone metabolic process	3/24	40/18866	1.73272E-05	0.000233524	0.000138866	AKR1B1/AKR1C1/AKR1C3	3
GO:0006979	response to oxidative stress	6/24	458/18866	1.8387E-05	0.0002423	0.000144085	AKR1C3/CYP1B1/DUOX2/GPX2/NQO1/TXNRD1	6
GO:1903409	reactive oxygen species biosynthetic process	4/24	128/18866	1.93356E-05	0.000249262	0.000148225	CYP1A1/CYP1B1/DUOX2/NQO1	4
GO:0017144	drug metabolic process	3/24	46/18866	2.64892E-05	0.000331401	0.00019707	CBR1/CYP1A1/CYP3A5	3
GO:0072593	reactive oxygen species metabolic process	5/24	288/18866	2.68251E-05	0.000331401	0.00019707	AKR1C3/CYP1A1/CYP1B1/DUOX2/NQO1	5
GO:0006692	prostanoid metabolic process	3/24	49/18866	3.20695E-05	0.000380345	0.000226175	AKR1C1/AKR1C3/CBR1	3
GO:0006693	prostaglandin metabolic process	3/24	49/18866	3.20695E-05	0.000380345	0.000226175	AKR1C1/AKR1C3/CBR1	3
GO:0034599	cellular response to oxidative stress	5/24	310/18866	3.81413E-05	0.000443486	0.000263722	AKR1C3/CYP1B1/GPX2/NQO1/TXNRD1	5
GO:0046164	alcohol catabolic process	3/24	55/18866	4.54375E-05	0.000518163	0.000308129	ADH7/AKR1B10/AKR1C3	3
GO:0007584	response to nutrient	4/24	171/18866	6.00951E-05	0.000672385	0.000399838	AKR1C3/ALDH3A1/CYP1A1/NQO1	4
GO:0016042	lipid catabolic process	5/24	343/18866	6.17025E-05	0.000677585	0.00040293	AKR1B10/AKR1C3/CYP1B1/CYP4F11/CYP4F3	5
GO:0006633	fatty acid biosynthetic process	4/24	173/18866	6.28752E-05	0.000677909	0.000403124	AKR1C3/CBR1/CYP1A1/CYP4F11	4
GO:0008300	isoprenoid catabolic process	2/24	10/18866	6.93606E-05	0.000709153	0.000421703	AKR1B10/AKR1C3	2
GO:0110096	cellular response to aldehyde	2/24	10/18866	6.93606E-05	0.000709153	0.000421703	AKR1B1/AKR1B10	2
GO:0120252	hydrocarbon metabolic process	2/24	10/18866	6.93606E-05	0.000709153	0.000421703	AKR1B1/CYP1A1	2
GO:0022900	electron transport chain	4/24	184/18866	7.98766E-05	0.000802827	0.000477407	AKR1B1/GPX2/ME1/TXNRD1	4
GO:0019371	cyclooxygenase pathway	2/24	11/18866	8.47082E-05	0.000823475	0.000489685	AKR1C3/CBR1	2
GO:0042758	long-chain fatty acid catabolic process	2/24	11/18866	8.47082E-05	0.000823475	0.000489685	CYP4F11/CYP4F3	2
GO:0042182	ketone catabolic process	2/24	12/18866	0.000101571	0.000956056	0.000568526	CYP4F11/CYP4F3	2
GO:0042363	fat-soluble vitamin catabolic process	2/24	12/18866	0.000101571	0.000956056	0.000568526	CYP4F11/CYP4F3	2
GO:0009111	vitamin catabolic process	2/24	14/18866	0.000139827	0.001275654	0.000758577	CYP4F11/CYP4F3	2
GO:1901569	fatty acid derivative catabolic process	2/24	14/18866	0.000139827	0.001275654	0.000758577	CYP4F11/CYP4F3	2
GO:0009404	toxin metabolic process	2/24	15/18866	0.000161214	0.001426862	0.000848493	CYP1A1/CYP1B1	2
GO:0016114	terpenoid biosynthetic process	2/24	15/18866	0.000161214	0.001426862	0.000848493	AKR1C3/CYP1A1	2
GO:0042448	progesterone metabolic process	2/24	17/18866	0.000208486	0.001791769	0.001065488	AKR1C1/AKR1C3	2
GO:0050665	hydrogen peroxide biosynthetic process	2/24	17/18866	0.000208486	0.001791769	0.001065488	CYP1A1/DUOX2	2
GO:0072330	monocarboxylic acid biosynthetic process	4/24	246/18866	0.000244124	0.002068079	0.001229798	AKR1C3/CBR1/CYP1A1/CYP4F11	4
GO:0019373	epoxygenase P450 pathway	2/24	20/18866	0.000290589	0.00242703	0.00144325	CYP1A1/CYP1B1	2
GO:0016054	organic acid catabolic process	4/24	282/18866	0.000410145	0.003331726	0.001981234	CD44/CYP4F11/CYP4F3/HGD	4
GO:0046395	carboxylic acid catabolic process	4/24	282/18866	0.000410145	0.003331726	0.001981234	CD44/CYP4F11/CYP4F3/HGD	4
GO:0008299	isoprenoid biosynthetic process	2/24	28/18866	0.000574537	0.00460406	0.002737836	AKR1C3/CYP1A1	2
GO:0046683	response to organophosphorus	3/24	134/18866	0.000635756	0.005026714	0.00298917	AKR1C1/ALDH3A1/DUOX2	3
GO:0001516	prostaglandin biosynthetic process	2/24	30/18866	0.000660147	0.005083992	0.003023231	AKR1C3/CBR1	2
GO:0046457	prostanoid biosynthetic process	2/24	30/18866	0.000660147	0.005083992	0.003023231	AKR1C3/CBR1	2
GO:0006691	leukotriene metabolic process	2/24	35/18866	0.000899461	0.006838213	0.004066391	CYP4F11/CYP4F3	2
GO:0046394	carboxylic acid biosynthetic process	4/24	367/18866	0.001099926	0.008175324	0.004861514	AKR1C3/CBR1/CYP1A1/CYP4F11	4
GO:0016053	organic acid biosynthetic process	4/24	368/18866	0.001111068	0.008175324	0.004861514	AKR1C3/CBR1/CYP1A1/CYP4F11	4
GO:0006778	porphyrin-containing compound metabolic process	2/24	39/18866	0.001116697	0.008175324	0.004861514	ABCB6/CYP1A1	2
GO:0034614	cellular response to reactive oxygen species	3/24	170/18866	0.001265826	0.009154082	0.005443538	AKR1C3/CYP1B1/NQO1	3
GO:0071248	cellular response to metal ion	3/24	193/18866	0.001820956	0.013009961	0.007736464	AKR1C3/CYP1A1/NQO1	3
GO:0006694	steroid biosynthetic process	3/24	197/18866	0.001930712	0.013629907	0.008105119	AKR1B1/AKR1C3/CYP1A1	3
GO:0019216	regulation of lipid metabolic process	4/24	431/18866	0.001986186	0.013856568	0.008239904	AKR1C3/CYP1A1/ME1/TXNRD1	4
GO:0042743	hydrogen peroxide metabolic process	2/24	57/18866	0.002371842	0.016354681	0.009725425	CYP1A1/DUOX2	2
GO:0006636	unsaturated fatty acid biosynthetic process	2/24	59/18866	0.002538806	0.016915866	0.010059138	AKR1C3/CBR1	2
GO:0045454	cell redox homeostasis	2/24	59/18866	0.002538806	0.016915866	0.010059138	NQO1/TXNRD1	2
GO:0046456	icosanoid biosynthetic process	2/24	59/18866	0.002538806	0.016915866	0.010059138	AKR1C3/CBR1	2
GO:0071241	cellular response to inorganic substance	3/24	221/18866	0.002676334	0.01763407	0.010486222	AKR1C3/CYP1A1/NQO1	3
GO:0033013	tetrapyrrole metabolic process	2/24	61/18866	0.002711174	0.017667318	0.010505994	ABCB6/CYP1A1	2
GO:0031667	response to nutrient levels	4/24	473/18866	0.002783377	0.01794068	0.01066855	AKR1C3/ALDH3A1/CYP1A1/NQO1	4
GO:0097305	response to alcohol	3/24	234/18866	0.003145149	0.020054555	0.011925581	ADH7/AKR1C3/NQO1	3
GO:0000302	response to reactive oxygen species	3/24	235/18866	0.003183169	0.020081055	0.011941339	AKR1C3/CYP1B1/NQO1	3
GO:0042446	hormone biosynthetic process	2/24	68/18866	0.003356634	0.020952462	0.012459527	AKR1B1/DUOX2	2
GO:0070988	demethylation	2/24	72/18866	0.003754614	0.023192562	0.013791619	CYP1A1/CYP3A5	2
GO:0006801	superoxide metabolic process	2/24	74/18866	0.003961469	0.02421805	0.014401432	DUOX2/NQO1	2
GO:0006809	nitric oxide biosynthetic process	2/24	79/18866	0.004501339	0.027237692	0.016197083	CYP1B1/NQO1	2
GO:0030258	lipid modification	3/24	271/18866	0.00474566	0.028426022	0.016903732	ADH7/CYP1A1/CYP3A5	3
GO:0046209	nitric oxide metabolic process	2/24	84/18866	0.005073367	0.030085064	0.017890293	CYP1B1/NQO1	2
GO:2001057	reactive nitrogen species metabolic process	2/24	87/18866	0.005431855	0.031891978	0.018964787	CYP1B1/NQO1	2
GO:0046427	positive regulation of receptor signaling pathway via JAK-STAT	2/24	90/18866	0.005801692	0.033729446	0.02005745	AKR1B1/CYP1B1	2
GO:1904894	positive regulation of receptor signaling pathway via STAT	2/24	93/18866	0.006182795	0.035596094	0.021167465	AKR1B1/CYP1B1	2
GO:0051591	response to cAMP	2/24	94/18866	0.006312319	0.035992356	0.021403105	ALDH3A1/DUOX2	2
GO:1901655	cellular response to ketone	2/24	97/18866	0.006708312	0.037885992	0.022529169	AKR1B1/AKR1C3	2
GO:0070301	cellular response to hydrogen peroxide	2/24	100/18866	0.007115376	0.03980583	0.023670814	CYP1B1/NQO1	2
GO:0022600	digestive system process	2/24	102/18866	0.007392861	0.040906069	0.024325079	AKR1C1/TFF3	2
GO:0007568	aging	3/24	319/18866	0.007450009	0.040906069	0.024325079	ALDH3A1/CYP1A1/NQO1	3
GO:1901570	fatty acid derivative biosynthetic process	2/24	103/18866	0.007533427	0.040984609	0.024371783	AKR1C3/CBR1	2
GO:0018958	phenol-containing compound metabolic process	2/24	109/18866	0.008402163	0.045295296	0.026935163	AKR1B1/DUOX2	2
GO:0009062	fatty acid catabolic process	2/24	114/18866	0.009158958	0.048930289	0.029096737	CYP4F11/CYP4F3	2
GO:0045471	response to ethanol	2/24	122/18866	0.010430956	0.055228188	0.032841827	ADH7/NQO1	2
GO:0010038	response to metal ion	3/24	366/18866	0.010834287	0.056840039	0.033800325	AKR1C3/CYP1A1/NQO1	3
GO:0003014	renal system process	2/24	125/18866	0.01092709	0.056840039	0.033800325	AKR1B1/AKR1C3	2
GO:0015886	heme transport	1/24	10/18866	0.012651721	0.064039445	0.038081502	ABCB6	1
GO:0072329	monocarboxylic acid catabolic process	2/24	138/18866	0.013195166	0.064039445	0.038081502	CYP4F11/CYP4F3	2
GO:0042493	response to drug	3/24	397/18866	0.013484467	0.064039445	0.038081502	ALDH3A1/CYP1A1/S100A10	3
GO:0009308	amine metabolic process	2/24	140/18866	0.013560883	0.064039445	0.038081502	CYP1A1/NQO1	2
GO:0007586	digestion	2/24	141/18866	0.013745396	0.064039445	0.038081502	AKR1C1/TFF3	2
GO:0006558	L-phenylalanine metabolic process	1/24	11/18866	0.013908422	0.064039445	0.038081502	HGD	1
GO:0006559	L-phenylalanine catabolic process	1/24	11/18866	0.013908422	0.064039445	0.038081502	HGD	1
GO:0006570	tyrosine metabolic process	1/24	11/18866	0.013908422	0.064039445	0.038081502	HGD	1
GO:0017085	response to insecticide	1/24	11/18866	0.013908422	0.064039445	0.038081502	CYP1A1	1
GO:0061299	retina vasculature morphogenesis in camera-type eye	1/24	11/18866	0.013908422	0.064039445	0.038081502	CYP1B1	1
GO:0072205	metanephric collecting duct development	1/24	11/18866	0.013908422	0.064039445	0.038081502	AKR1B1	1
GO:1902221	erythrose 4-phosphate/phosphoenolpyruvate family amino acid metabolic process	1/24	11/18866	0.013908422	0.064039445	0.038081502	HGD	1
GO:1902222	erythrose 4-phosphate/phosphoenolpyruvate family amino acid catabolic process	1/24	11/18866	0.013908422	0.064039445	0.038081502	HGD	1
GO:2000392	regulation of lamellipodium morphogenesis	1/24	11/18866	0.013908422	0.064039445	0.038081502	CD44	1
GO:0046425	regulation of receptor signaling pathway via JAK-STAT	2/24	142/18866	0.013931009	0.064039445	0.038081502	AKR1B1/CYP1B1	2
GO:0042542	response to hydrogen peroxide	2/24	146/18866	0.0146844	0.066541797	0.039569543	CYP1B1/NQO1	2
GO:0001765	membrane raft assembly	1/24	12/18866	0.01516359	0.066541797	0.039569543	S100A10	1
GO:0006069	ethanol oxidation	1/24	12/18866	0.01516359	0.066541797	0.039569543	ADH7	1
GO:0033629	negative regulation of cell adhesion mediated by integrin	1/24	12/18866	0.01516359	0.066541797	0.039569543	CYP1B1	1
GO:0042178	xenobiotic catabolic process	1/24	12/18866	0.01516359	0.066541797	0.039569543	CYP1A1	1
GO:0071472	cellular response to salt stress	1/24	12/18866	0.01516359	0.066541797	0.039569543	AKR1B1	1
GO:0014074	response to purine-containing compound	2/24	149/18866	0.01526085	0.066541797	0.039569543	ALDH3A1/DUOX2	2
GO:1904892	regulation of receptor signaling pathway via STAT	2/24	151/18866	0.01565054	0.067742849	0.040283757	AKR1B1/CYP1B1	2
GO:0006068	ethanol catabolic process	1/24	13/18866	0.016417227	0.069045502	0.041058389	ADH7	1
GO:0030656	regulation of vitamin metabolic process	1/24	13/18866	0.016417227	0.069045502	0.041058389	AKR1C3	1
GO:0042415	norepinephrine metabolic process	1/24	13/18866	0.016417227	0.069045502	0.041058389	AKR1B1	1
GO:0042538	hyperosmotic salinity response	1/24	13/18866	0.016417227	0.069045502	0.041058389	AKR1B1	1
GO:0070486	leukocyte aggregation	1/24	14/18866	0.017669335	0.073272138	0.043571787	CD44	1
GO:1901678	iron coordination entity transport	1/24	14/18866	0.017669335	0.073272138	0.043571787	ABCB6	1
GO:0007259	receptor signaling pathway via JAK-STAT	2/24	164/18866	0.018286982	0.073812564	0.043893155	AKR1B1/CYP1B1	2
GO:0031960	response to corticosteroid	2/24	164/18866	0.018286982	0.073812564	0.043893155	AKR1C3/ALDH3A1	2
GO:0006000	fructose metabolic process	1/24	15/18866	0.018919915	0.073812564	0.043893155	AKR1B1	1
GO:0009415	response to water	1/24	15/18866	0.018919915	0.073812564	0.043893155	AKR1B1	1
GO:0043518	negative regulation of DNA damage response, signal transduction by p53 class mediator	1/24	15/18866	0.018919915	0.073812564	0.043893155	CD44	1
GO:0046033	AMP metabolic process	1/24	15/18866	0.018919915	0.073812564	0.043893155	NT5E	1
GO:0070365	hepatocyte differentiation	1/24	15/18866	0.018919915	0.073812564	0.043893155	CYP1A1	1
GO:0071474	cellular hyperosmotic response	1/24	15/18866	0.018919915	0.073812564	0.043893155	AKR1B1	1
GO:0072044	collecting duct development	1/24	15/18866	0.018919915	0.073812564	0.043893155	AKR1B1	1
GO:0062012	regulation of small molecule metabolic process	3/24	456/18866	0.01947766	0.074751243	0.044451347	AKR1C3/NQO1/TFF3	3
GO:0002070	epithelial cell maturation	1/24	16/18866	0.020168969	0.074751243	0.044451347	AKR1B1	1
GO:0007567	parturition	1/24	16/18866	0.020168969	0.074751243	0.044451347	CYP1A1	1
GO:0009812	flavonoid metabolic process	1/24	16/18866	0.020168969	0.074751243	0.044451347	CYP1A1	1
GO:0030214	hyaluronan catabolic process	1/24	16/18866	0.020168969	0.074751243	0.044451347	CD44	1
GO:0034116	positive regulation of heterotypic cell-cell adhesion	1/24	16/18866	0.020168969	0.074751243	0.044451347	CD44	1
GO:0090136	epithelial cell-cell adhesion	1/24	16/18866	0.020168969	0.074751243	0.044451347	CYP1B1	1
GO:1902166	negative regulation of intrinsic apoptotic signaling pathway in response to DNA damage by p53 class mediator	1/24	16/18866	0.020168969	0.074751243	0.044451347	CD44	1
GO:0097696	receptor signaling pathway via STAT	2/24	174/18866	0.020434394	0.075264571	0.044756601	AKR1B1/CYP1B1	2
GO:0010566	regulation of ketone biosynthetic process	1/24	17/18866	0.0214165	0.076505929	0.045494784	AKR1C3	1
GO:0030299	intestinal cholesterol absorption	1/24	17/18866	0.0214165	0.076505929	0.045494784	AKR1C1	1
GO:0048385	regulation of retinoic acid receptor signaling pathway	1/24	17/18866	0.0214165	0.076505929	0.045494784	AKR1C3	1
GO:0070293	renal absorption	1/24	17/18866	0.0214165	0.076505929	0.045494784	AKR1C3	1
GO:0072673	lamellipodium morphogenesis	1/24	17/18866	0.0214165	0.076505929	0.045494784	CD44	1
GO:0034755	iron ion transmembrane transport	1/24	18/18866	0.022662508	0.079519923	0.047287076	ABCB6	1
GO:0061298	retina vasculature development in camera-type eye	1/24	18/18866	0.022662508	0.079519923	0.047287076	CYP1B1	1
GO:1902165	regulation of intrinsic apoptotic signaling pathway in response to DNA damage by p53 class mediator	1/24	18/18866	0.022662508	0.079519923	0.047287076	CD44	1
GO:0010565	regulation of cellular ketone metabolic process	2/24	189/18866	0.02384371	0.081947099	0.048730413	AKR1C3/NQO1	2
GO:0033189	response to vitamin A	1/24	19/18866	0.023906995	0.081947099	0.048730413	CYP1A1	1
GO:0070989	oxidative demethylation	1/24	19/18866	0.023906995	0.081947099	0.048730413	CYP3A5	1
GO:0098856	intestinal lipid absorption	1/24	19/18866	0.023906995	0.081947099	0.048730413	AKR1C1	1
GO:1901136	carbohydrate derivative catabolic process	2/24	195/18866	0.025268936	0.086117696	0.051210488	CD44/NT5E	2
GO:0030277	maintenance of gastrointestinal epithelium	1/24	21/18866	0.026391416	0.088226558	0.052464537	TFF3	1
GO:0044241	lipid digestion	1/24	21/18866	0.026391416	0.088226558	0.052464537	AKR1C1	1
GO:1901654	response to ketone	2/24	200/18866	0.026482845	0.088226558	0.052464537	AKR1B1/AKR1C3	2
GO:2000377	regulation of reactive oxygen species metabolic process	2/24	200/18866	0.026482845	0.088226558	0.052464537	AKR1C3/CYP1B1	2
GO:0006067	ethanol metabolic process	1/24	22/18866	0.027631352	0.089537661	0.053244193	ADH7	1
GO:0035809	regulation of urine volume	1/24	22/18866	0.027631352	0.089537661	0.053244193	AKR1B1	1
GO:0042359	vitamin D metabolic process	1/24	22/18866	0.027631352	0.089537661	0.053244193	CYP1A1	1
GO:0055093	response to hyperoxia	1/24	22/18866	0.027631352	0.089537661	0.053244193	CYP1A1	1
GO:0071379	cellular response to prostaglandin stimulus	1/24	22/18866	0.027631352	0.089537661	0.053244193	AKR1C3	1
GO:0006590	thyroid hormone generation	1/24	23/18866	0.028869776	0.09058083	0.053864521	DUOX2	1
GO:0042451	purine nucleoside biosynthetic process	1/24	23/18866	0.028869776	0.09058083	0.053864521	NT5E	1
GO:0042455	ribonucleoside biosynthetic process	1/24	23/18866	0.028869776	0.09058083	0.053864521	NT5E	1
GO:0046129	purine ribonucleoside biosynthetic process	1/24	23/18866	0.028869776	0.09058083	0.053864521	NT5E	1
GO:0046135	pyrimidine nucleoside catabolic process	1/24	23/18866	0.028869776	0.09058083	0.053864521	NT5E	1
GO:1902254	negative regulation of intrinsic apoptotic signaling pathway by p53 class mediator	1/24	23/18866	0.028869776	0.09058083	0.053864521	CD44	1
GO:0019400	alditol metabolic process	1/24	25/18866	0.031342089	0.097073154	0.057725227	AKR1B1	1
GO:0051894	positive regulation of focal adhesion assembly	1/24	25/18866	0.031342089	0.097073154	0.057725227	S100A10	1
GO:0006700	C21-steroid hormone biosynthetic process	1/24	26/18866	0.032575982	0.097073154	0.057725227	AKR1B1	1
GO:0019430	removal of superoxide radicals	1/24	26/18866	0.032575982	0.097073154	0.057725227	NQO1	1
GO:0031579	membrane raft organization	1/24	26/18866	0.032575982	0.097073154	0.057725227	S100A10	1
GO:0034114	regulation of heterotypic cell-cell adhesion	1/24	26/18866	0.032575982	0.097073154	0.057725227	CD44	1
GO:0035902	response to immobilization stress	1/24	26/18866	0.032575982	0.097073154	0.057725227	CYP1A1	1
GO:0042403	thyroid hormone metabolic process	1/24	26/18866	0.032575982	0.097073154	0.057725227	DUOX2	1
GO:0042737	drug catabolic process	1/24	26/18866	0.032575982	0.097073154	0.057725227	CYP3A5	1
GO:0097066	response to thyroid hormone	1/24	26/18866	0.032575982	0.097073154	0.057725227	AKR1B1	1
GO:0044706	multi-multicellular organism process	2/24	226/18866	0.033166695	0.097550595	0.05800914	AKR1B1/CYP1A1	2
GO:0006779	porphyrin-containing compound biosynthetic process	1/24	27/18866	0.03380837	0.097550595	0.05800914	ABCB6	1
GO:0009651	response to salt stress	1/24	27/18866	0.03380837	0.097550595	0.05800914	AKR1B1	1
GO:0015949	nucleobase-containing small molecule interconversion	1/24	27/18866	0.03380837	0.097550595	0.05800914	TXNRD1	1
GO:0033014	tetrapyrrole biosynthetic process	1/24	27/18866	0.03380837	0.097550595	0.05800914	ABCB6	1
GO:2000353	positive regulation of endothelial cell apoptotic process	1/24	27/18866	0.03380837	0.097550595	0.05800914	AKR1C3	1
GO:0007160	cell-matrix adhesion	2/24	230/18866	0.034248532	0.097550595	0.05800914	CD44/S100A10	2
GO:0006972	hyperosmotic response	1/24	28/18866	0.035039252	0.097550595	0.05800914	AKR1B1	1
GO:0009074	aromatic amino acid family catabolic process	1/24	28/18866	0.035039252	0.097550595	0.05800914	HGD	1
GO:0010575	positive regulation of vascular endothelial growth factor production	1/24	28/18866	0.035039252	0.097550595	0.05800914	CYP1B1	1
GO:0010669	epithelial structure maintenance	1/24	28/18866	0.035039252	0.097550595	0.05800914	TFF3	1
GO:0071280	cellular response to copper ion	1/24	28/18866	0.035039252	0.097550595	0.05800914	CYP1A1	1
GO:0071450	cellular response to oxygen radical	1/24	28/18866	0.035039252	0.097550595	0.05800914	NQO1	1
GO:0071451	cellular response to superoxide	1/24	28/18866	0.035039252	0.097550595	0.05800914	NQO1	1
GO:0015721	bile acid and bile salt transport	1/24	29/18866	0.036268632	0.099570829	0.059210486	AKR1C1	1
GO:0036296	response to increased oxygen levels	1/24	29/18866	0.036268632	0.099570829	0.059210486	CYP1A1	1
GO:0150117	positive regulation of cell-substrate junction organization	1/24	29/18866	0.036268632	0.099570829	0.059210486	S100A10	1
GO:0000303	response to superoxide	1/24	30/18866	0.037496511	0.10199739	0.060653458	NQO1	1
GO:0007271	synaptic transmission, cholinergic	1/24	30/18866	0.037496511	0.10199739	0.060653458	NQO1	1
GO:0000305	response to oxygen radical	1/24	31/18866	0.038722891	0.103435469	0.061508622	NQO1	1
GO:0009154	purine ribonucleotide catabolic process	1/24	31/18866	0.038722891	0.103435469	0.061508622	NT5E	1
GO:1902230	negative regulation of intrinsic apoptotic signaling pathway in response to DNA damage	1/24	31/18866	0.038722891	0.103435469	0.061508622	CD44	1
GO:1902253	regulation of intrinsic apoptotic signaling pathway by p53 class mediator	1/24	31/18866	0.038722891	0.103435469	0.061508622	CD44	1
GO:0009164	nucleoside catabolic process	1/24	32/18866	0.039947772	0.104335457	0.062043806	NT5E	1
GO:0009261	ribonucleotide catabolic process	1/24	32/18866	0.039947772	0.104335457	0.062043806	NT5E	1
GO:0032350	regulation of hormone metabolic process	1/24	32/18866	0.039947772	0.104335457	0.062043806	AKR1C3	1
GO:0034694	response to prostaglandin	1/24	32/18866	0.039947772	0.104335457	0.062043806	AKR1C3	1
GO:0042744	hydrogen peroxide catabolic process	1/24	32/18866	0.039947772	0.104335457	0.062043806	DUOX2	1
GO:0019318	hexose metabolic process	2/24	254/18866	0.041024626	0.104335457	0.062043806	AKR1B1/TFF3	2
GO:0010039	response to iron ion	1/24	33/18866	0.041171159	0.104335457	0.062043806	CYP1A1	1
GO:0044319	wound healing, spreading of cells	1/24	33/18866	0.041171159	0.104335457	0.062043806	CD44	1
GO:0048384	retinoic acid receptor signaling pathway	1/24	33/18866	0.041171159	0.104335457	0.062043806	AKR1C3	1
GO:0090505	epiboly involved in wound healing	1/24	33/18866	0.041171159	0.104335457	0.062043806	CD44	1
GO:0120255	olefinic compound biosynthetic process	1/24	33/18866	0.041171159	0.104335457	0.062043806	AKR1C3	1
GO:1901797	negative regulation of signal transduction by p53 class mediator	1/24	33/18866	0.041171159	0.104335457	0.062043806	CD44	1
GO:1901617	organic hydroxy compound biosynthetic process	2/24	258/18866	0.042200061	0.105184431	0.062548654	AKR1B1/AKR1C3	2
GO:0042759	long-chain fatty acid biosynthetic process	1/24	34/18866	0.042393051	0.105184431	0.062548654	CYP1A1	1
GO:0043516	regulation of DNA damage response, signal transduction by p53 class mediator	1/24	34/18866	0.042393051	0.105184431	0.062548654	CD44	1
GO:0046685	response to arsenic-containing substance	1/24	34/18866	0.042393051	0.105184431	0.062548654	CYP1A1	1
GO:0090504	epiboly	1/24	34/18866	0.042393051	0.105184431	0.062548654	CD44	1
GO:0001894	tissue homeostasis	2/24	261/18866	0.043090023	0.106468266	0.063312096	AKR1B1/TFF3	2
GO:0006739	NADP metabolic process	1/24	35/18866	0.04361345	0.107314423	0.063815269	ME1	1
GO:0030522	intracellular receptor signaling pathway	2/24	265/18866	0.044287702	0.108523171	0.064534059	AHRR/AKR1C3	2
GO:0006213	pyrimidine nucleoside metabolic process	1/24	36/18866	0.044832359	0.108957332	0.064792236	NT5E	1
GO:0042554	superoxide anion generation	1/24	36/18866	0.044832359	0.108957332	0.064792236	DUOX2	1
GO:0003091	renal water homeostasis	1/24	37/18866	0.04604978	0.110556758	0.065743346	AKR1B1	1
GO:0009167	purine ribonucleoside monophosphate metabolic process	1/24	37/18866	0.04604978	0.110556758	0.065743346	NT5E	1
GO:0030212	hyaluronan metabolic process	1/24	37/18866	0.04604978	0.110556758	0.065743346	CD44	1
GO:0032094	response to food	1/24	38/18866	0.047265713	0.1116676	0.066403916	CYP1A1	1
GO:0046466	membrane lipid catabolic process	1/24	38/18866	0.047265713	0.1116676	0.066403916	CYP1B1	1
GO:0071276	cellular response to cadmium ion	1/24	38/18866	0.047265713	0.1116676	0.066403916	AKR1C3	1
GO:1900026	positive regulation of substrate adhesion-dependent cell spreading	1/24	38/18866	0.047265713	0.1116676	0.066403916	S100A10	1
GO:0009163	nucleoside biosynthetic process	1/24	39/18866	0.048480161	0.112740138	0.067041708	NT5E	1
GO:0071709	membrane assembly	1/24	39/18866	0.048480161	0.112740138	0.067041708	S100A10	1
GO:0072529	pyrimidine-containing compound catabolic process	1/24	39/18866	0.048480161	0.112740138	0.067041708	NT5E	1
GO:1902229	regulation of intrinsic apoptotic signaling pathway in response to DNA damage	1/24	39/18866	0.048480161	0.112740138	0.067041708	CD44	1
GO:0009072	aromatic amino acid family metabolic process	1/24	40/18866	0.049693125	0.114217143	0.067920019	HGD	1
GO:0009126	purine nucleoside monophosphate metabolic process	1/24	40/18866	0.049693125	0.114217143	0.067920019	NT5E	1
GO:0050892	intestinal absorption	1/24	40/18866	0.049693125	0.114217143	0.067920019	AKR1C1	1
